# Supplementary material for: STERILE APETALA modulates the stability of a repressor protein complex to control organ size in Arabidopsis thaliana
Source: PubMed Central journal article supplement (PMC5814100; doi:10.1371/journal.pgen.1007218), 2018-02-05
Supplement: pgen.1007218.s002.pdf [file pgen.1007218.s002.pdf]

+ + Myc-TPL  
- + GFP-SAP  
+ - GFP  
+ + EOD1-Flag

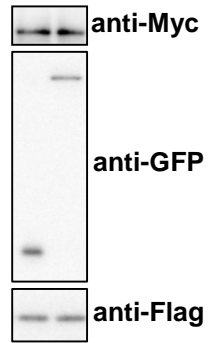

Figure S2
