# Supplementary material for: STERILE APETALA modulates the stability of a repressor protein complex to control organ size in Arabidopsis thaliana
Source: PubMed Central journal article supplement (PMC5814100; doi:10.1371/journal.pgen.1007218), 2018-02-05
Supplement: pgen.1007218.s006.pdf [file pgen.1007218.s006.pdf]

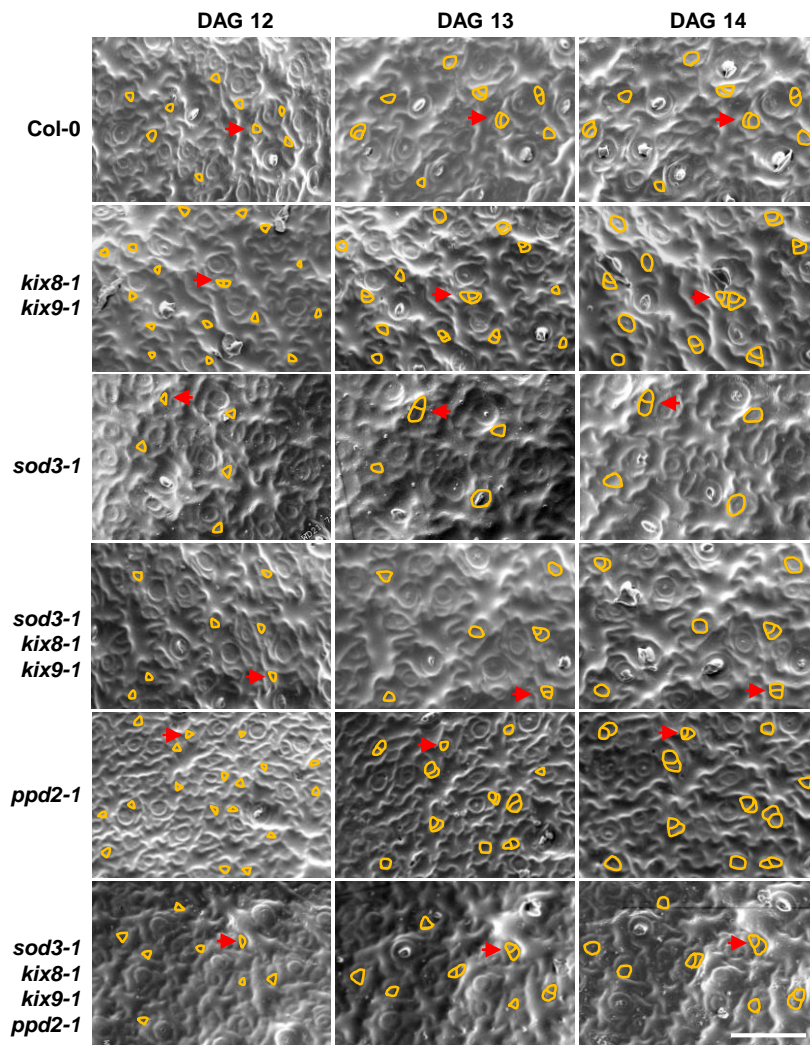

Figure S6
