# Supplementary material for: STERILE APETALA modulates the stability of a repressor protein complex to control organ size in Arabidopsis thaliana
Source: PubMed Central journal article supplement (PMC5814100; doi:10.1371/journal.pgen.1007218), 2018-02-05
Supplement: pgen.1007218.s008.pdf [file pgen.1007218.s008.pdf]

**Supplemental Table 1. List of primers used in this study**

| <b>Primer Name</b> | <b>Sequence</b>                                       |
|--------------------|-------------------------------------------------------|
| KIX8-F/R-myc       | GAAGAGGACTTGAATTCGGTACCCATGCCGAGGCCAGGACC<br>AAGACCTT |
| KIX8-F/R-myc       | TAGGCTACGTAGGATCCACTAAAGGAAGTCTCCACACAAAG<br>TT       |
| KIX9-F/R-myc       | GAAGAGGACTTGAATTCGGTACCCATGCCGAGGCCAGGGCC<br>AAGACCGT |
| KIX9-F/R-myc       | TAGGCTACGTAGGATCCATCAGTTGTTATTGTTGCTGCTTATC           |
| TPL-F/R-myc        | GAGGACTTGAATTCGGTACCCATGTCTTCTCTTAGTAGAGAG<br>C       |
| TPL-F/R-myc        | CGATTTCGAACCCGGGGTACCTCATCTCTGAGGCTGATCAG             |
| SAP-RT-F           | GAATCTCTCGCCGTTCAAGT                                  |
| SAP-RT-R           | CCCAAACCTGGCGAGATAGT                                  |
| ACTIN2-F           | GAAATCACAGCACTTGCACC                                  |
| ACTIN2-R           | AAGCCTTTGATCTTGAGAGC                                  |
| CYCD3;2-RT-F       | GTTGGAGCACAATCCAAGC                                   |
| CYCD3;2-RT-<br>R   | AGTGGAGACATTCCAGGAGC                                  |
| CYCD3;3-RT-F       | GATTTTCAAGTGGAAGAAGCAAG                               |
| CYCD3;3-RT-<br>R   | CGAAAAACGAGATTGGAGTC                                  |
| CYCDB1;1-RT<br>-F  | ATTATGTCTTCCTAGCTCGTT                                 |
| CYCDB1;1-RT<br>-R  | TGCATTACGCCTAACTCAGC                                  |
| CYCA2;1-RT-F       | ACCGAGTAATAAACGAATGGC                                 |
| CYCA2;2-RT-<br>R   | GTTTCTTTACCACCTCGCTTG                                 |
| SPCH-RT-F          | ATAATAAGCAAGATGGGCAAC                                 |
| SPCH-RT-R          | TTTGACGTAGAAACAAGGCAT                                 |
| MUTE-RT-F          | CGAGCATCTTAAATCCCTTCGT                                |
| MUTE-RT-R          | TCTTTCGACGTTTCTTGGACT                                 |
| TSBT1.3-RT-F       | AATATTCTTGCAGCTTGGAC                                  |
| TSBT1.3-RT-R       | GATCAAAGCAGCTACACCAC                                  |
| PPD1-RT-F          | AAAGACAGAAAATTCTCAAAGG                                |
| PPD1-RT-R          | AGTGGAGATCCGGTGCAGCC                                  |
| PPD2-RT-F          | ATTTTCTAAGACCAAGAAGGC                                 |
| PPD2-RT-R          | CGCAATGCCCTGTGCCACT                                   |
| KIX8-F/R-AD        | GCCATGGAGGCCAGTGAATTCATGCCGAGGCCAGGACCAAG<br>AC       |
| KIX8-F/R-AD        | CAGCTCGAGCTCGATGGATCCCTAAAGGAAGTCTCCACACA<br>AAG      |
| KIX9-F/R-AD        | GCCATGGAGGCCAGTGAATTCATGCCGAGGCCAGGGCCAAG             |

---

|                      |                                                        |
|----------------------|--------------------------------------------------------|
|                      | ACCGTACGAC                                             |
| KIX9-F/R-AD          | CAGCTCGAGCTCGATGGATCCTCAGTTGTTATTGTTGCTGCT<br>T        |
| PPD1-F/R-AD          | GCCATGGAGGCCAGTGAATTCATGGATGTCGGAGTTTCACCG             |
| PPD1-F/R-AD          | CAGCTCGAGCTCGATGGATCCTTAAATGCCTTCACTGTTTAG             |
| PPD2-F/R-AD          | GCCATGGAGGCCAGTGAATTCATGGATGTAGGAGTTACTACG<br>GC       |
| PPD2-F/R-AD          | CAGCTCGAGCTCGATGGATCCTTAAATTATCTTCGCTGTTTAG            |
| KIX9KIX-<br>F/R-AD   | GACGTACCAGATTACGCTCATATGATGCCGAGGCCAGGGCCA<br>AGAC     |
| KIX9KIX-<br>F/R-AD   | TTCACTGGCCTCCATGGCCATATGTTAGGCTTTGGAATACATG<br>ATTTCTT |
| KIX9C-<br>F/R-AD     | GACGTACCAGATTACGCTCATATGGACTCAACTAACTTGGAC<br>AACAT    |
| KIX9C-<br>F/R-AD     | TTCACTGGCCTCCATGGCCATATGTTAGTTGTTATTGTTGCTG<br>CTTATC  |
| KIX9KIX-B-F/<br>R-AD | GACGTACCAGATTACGCTCATATGATGCCGAGGCCAGGGCCA<br>AGAC     |
| KIX9KIX-B-F/<br>R-AD | TTCACTGGCCTCCATGGCCATATGTTATTGGCTAAGATAACAT<br>CTCGGGT |
| KIX9B-C-F/R-<br>AD   | GACGTACCAGATTACGCTCATATGAATTCTGAGGCTGAGTATA<br>TG      |
| KIX9B-C-F/R-<br>AD   | TTCACTGGCCTCCATGGCCATATGTTAGTTGTTATTGTTGCTG<br>CTTATC  |
| KIX9KIX-C-F-<br>ADM  | AAGAAATCATGTATTCCAAAGCCGACTCAACTAACTTGGAC<br>AACAT     |
| KIX9KIX-C-R-<br>ADM  | ATGTTGTCCAAGTTAGTTGAGTCGGCTTTGGAATACATGATT<br>TCTT     |
| KIX8KIX-B-F/<br>R-AD | GACGTACCAGATTACGCTCATATGATGCCGAGGCCAGGACCA<br>AGAC     |
| KIX8KIX-B-F/<br>R-AD | TTCACTGGCCTCCATGGCCATATGTTAGAGGTAAGTCCTTCC<br>GCTACT   |
| KIX8B-C-F/R-<br>AD   | GACGTACCAGATTACGCTCATATGAATTCGAGGAAGAGTAT<br>ACAG      |
| KIX8B-C-F/R-<br>AD   | TTCACTGGCCTCCATGGCCATATGTTAAAGGAAGTCTCCACA<br>CAAAGT   |
| KIX8KIX-<br>F/R-AD   | GACGTACCAGATTACGCTCATATGATGCCGAGGCCAGGACCA<br>AGAC     |
| KIX8KIX-<br>F/R-AD   | TTCACTGGCCTCCATGGCCATATGTTAGGCTTTAGAGTACATG<br>ATTTCT  |
| KIX8C-<br>F/R-AD     | GACGTACCAGATTACGCTCATATGGGTCCTAAAATTCAGGAA<br>CCGGT    |
| KIX8C-<br>F/R-AD     | TTCACTGGCCTCCATGGCCATATGTTAAAGGAAGTCTCCACA<br>CAAAGT   |

---

---

|                 |                                                    |
|-----------------|----------------------------------------------------|
| KIX8KIX-C-F-ADM | GGTCCTAAAATTCAGGAACCGGTGAAATCATGTACTCTAAAGCC       |
| KIX8KIX-C-R-ADM | GGCTTTAGAGTACATGATTTACCGGTTCTGAATTTTAGGACC         |
| KIX8-F/R-HIS    | ATGGGTCGCGGATCCGAATTCATGCCGAGGCCAGGACCAAGAC        |
| KIX8-F/R-HIS    | TGCGGCCGCAAGCTTGTCGACCTAAAGGAAGTCTCCACACA<br>AAG   |
| KIX9-F/R-HIS    | ATGGGTCGCGGATCCGAATTCATGCCGAGGCCAGGGCCAAGAC        |
| KIX9-F/R-HIS    | TGCGGCCGCAAGCTTGTCGACTCAGTTGTTATTGTTGCTGCT<br>T    |
| KIX8-F/R-LUC    | GAGCTCGGTACCCGGGGATCCATGCCGAGGCCAGGACCAAG<br>ACCTT |
| KIX8-F/R-LUC    | GCGTACGAGATCTGGTCGACAAGGAAGTCTCCACACAAAGT<br>T     |
| KIX9-F/R-LUC    | GAGCTCGGTACCCGGGGATCCATGCCGAGGCCAGGGCCAAG<br>ACCGT |
| KIX9-F/R-LUC    | GCGTACGAGATCTGGTCGACGTTGTTATTGTTGCTGCTTATC         |
| SAP-F/R-LUC     | GAGCTCGGTACCCGGGGATCCATGTCTACCTCCTCCTCTTCT<br>T    |
| SAP-F/R-LUC     | GCGTACGAGATCTGGTCGACCAGTGCACCGAAATCCCATAG          |

---
